# Supplementary material for: Effect of Metabolic Adaptation by Voluntary Running Wheel Activity and Aldosterone Inhibition on Renal Function in Female Spontaneously Hypertensive Rats
Source: MDPI journal article supplement (doi:10.3390/cells11243954), 2022-12-07
Supplement: s1 [file s1]

Fig. Suppl. 1: Study Protocol

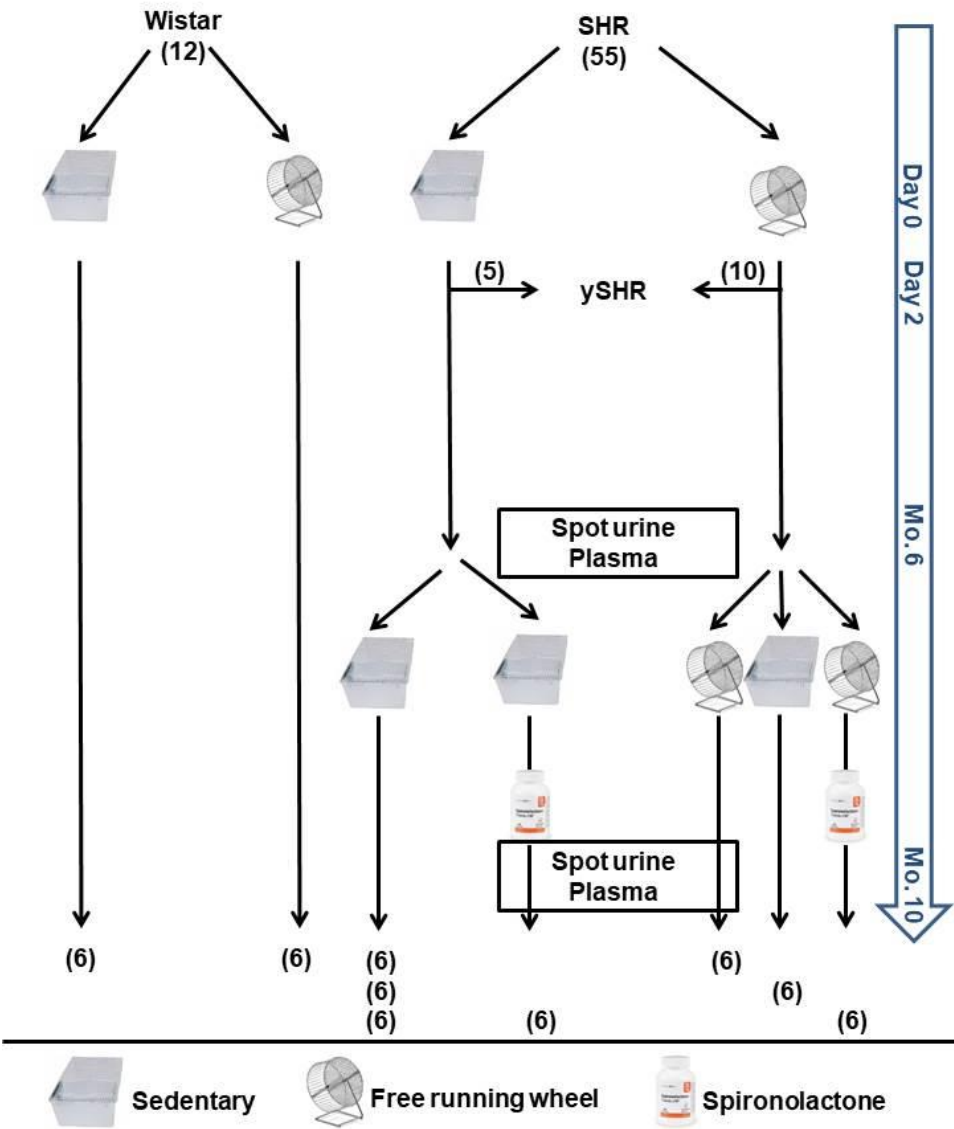

Table S1: Primer Sequences used for RT-PCR analysis

| Gene   | Forward                | Reverse                 |
|--------|------------------------|-------------------------|
| ARG2   | TGAGGAGCAGCGTCTCCCGT   | GCTTCTCGGATGGCGGCTGG    |
| B2M    | GCCGTCGTGCTTGCCATTC    | CTGAGGTGGGTGGAAGTGAAGAC |
| HAVCR1 | CTTTGAGGAAGCCGCAGAGA   | ATGTTGCTTTCAGCTCGGGG    |
| LDLR   | CTGGCGGCTGAGGAACATTA   | ATCCTCCAGGCTGACCATCT    |
| ODC    | GAAGATGAGTCAAACGAGCA   | AGTAGATGTTTGGCCTCTGG    |
| PCSK9  | TTGAACAAACTGCCCATCGC   | CCCAACAGGTCAGTCTCAT     |
| REN    | GGAGGATGCCTCTCTGGGCACT | GATTTCCCGGACCGAGGGCA    |
